# Supplementary material
Source: ML conference proceedings conference paper supplement (https://openreview.net/forum?id=z8Bz7m6T-xJ)
Supplement: supplementary_material [file attachment]

# Codebase for Multi-Label Iterated Learning (MILe)

Welcome to the codebase for the ICLR2022 submission titled "Overcoming Label Ambiguity with Multi-Label Iterated Learning"

## Setup

We assume the user to have a data directory which is stored in the `bash` variable `$DATADIR`. `$DATADIR` should contain a folder with the ILSVRC2012 dataset. The folder should contain `imagenet/train` and `imagenet/val`.

1. `pip install -r requirements.txt`
2. Download ImageNet Real labels:

```
wget https://raw.githubusercontent.com/google-research/reassessed-  
imagenet/master/real.json  
mkdir -p ./$DATADIR/real  
mv real.json ./$DATADIR/real/
```

Usage:

```
python3 trainval_iters.py -e iterative_original_imagenet_real_k1k2 -sb logs -d  
$DATADIR
```

You can adjust the number of teacher (`k1`) and student (`k2`) iterations in `exp_configs.py`.
